# Supplementary material for: BODIPY-derived multi-channel polymeric chemosensor with pH-tunable sensitivity: selective colorimetric and fluorimetric detection of Hg2+ and HSO4− in aqueous media
Source: Royal Society of Chemistry journal article supplement (doi:10.1039/c8py01232f), 2018-01-01
Supplement: c8py01232f1.pdf [file c8py01232f1.pdf]

Supporting Information

**BODIPY-derived multi-channel polymeric chemosensor with pH-tunable sensitivity: selective colorimetric and fluorimetric detection of  $\text{Hg}^{2+}$  and  $\text{HSO}_4^-$  in aqueous media**

Ujjal Haldar and Hyung-il Lee

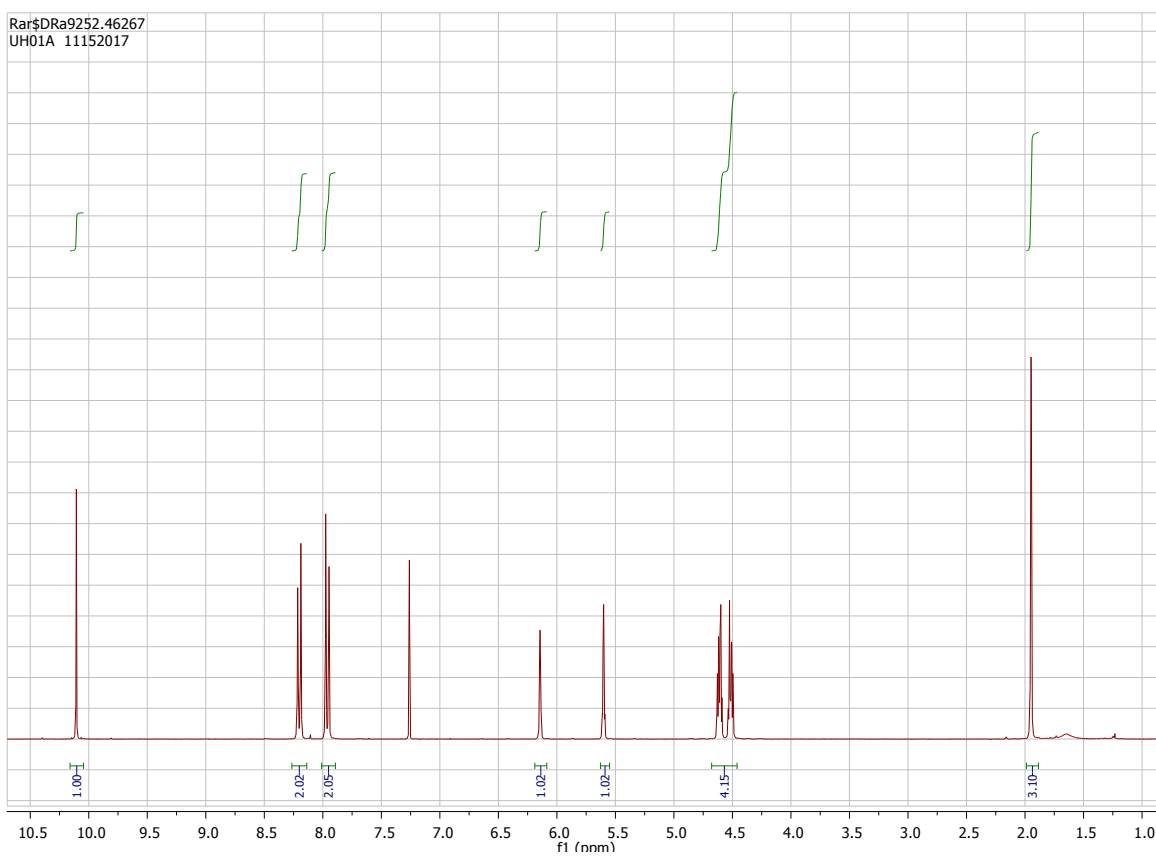

**Fig. S1**  $^1\text{H}$  NMR spectrum of **1**.

Rar\$DRa13584.37673  
171120 UH25R

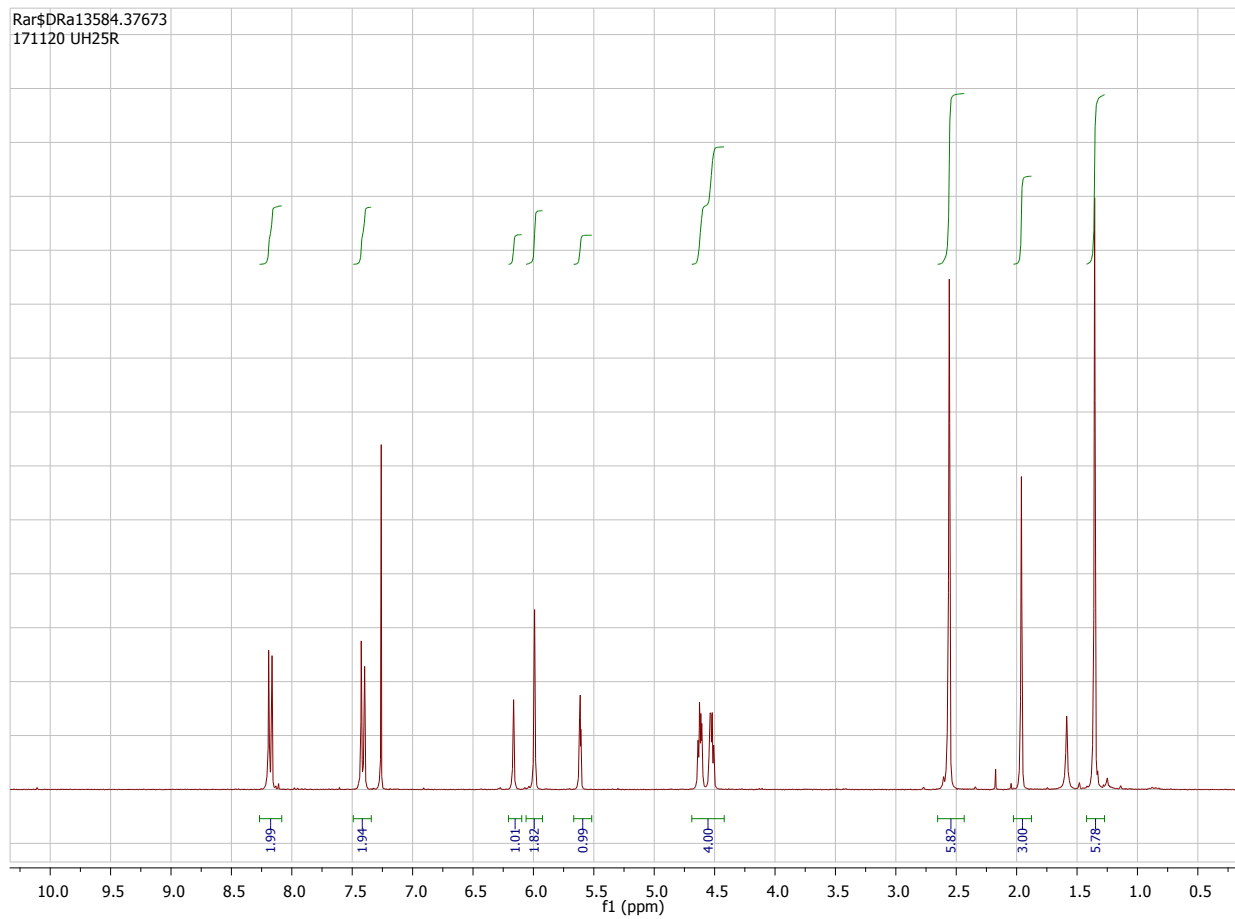

**Fig. S2** <sup>1</sup>H NMR spectrum of **2**.

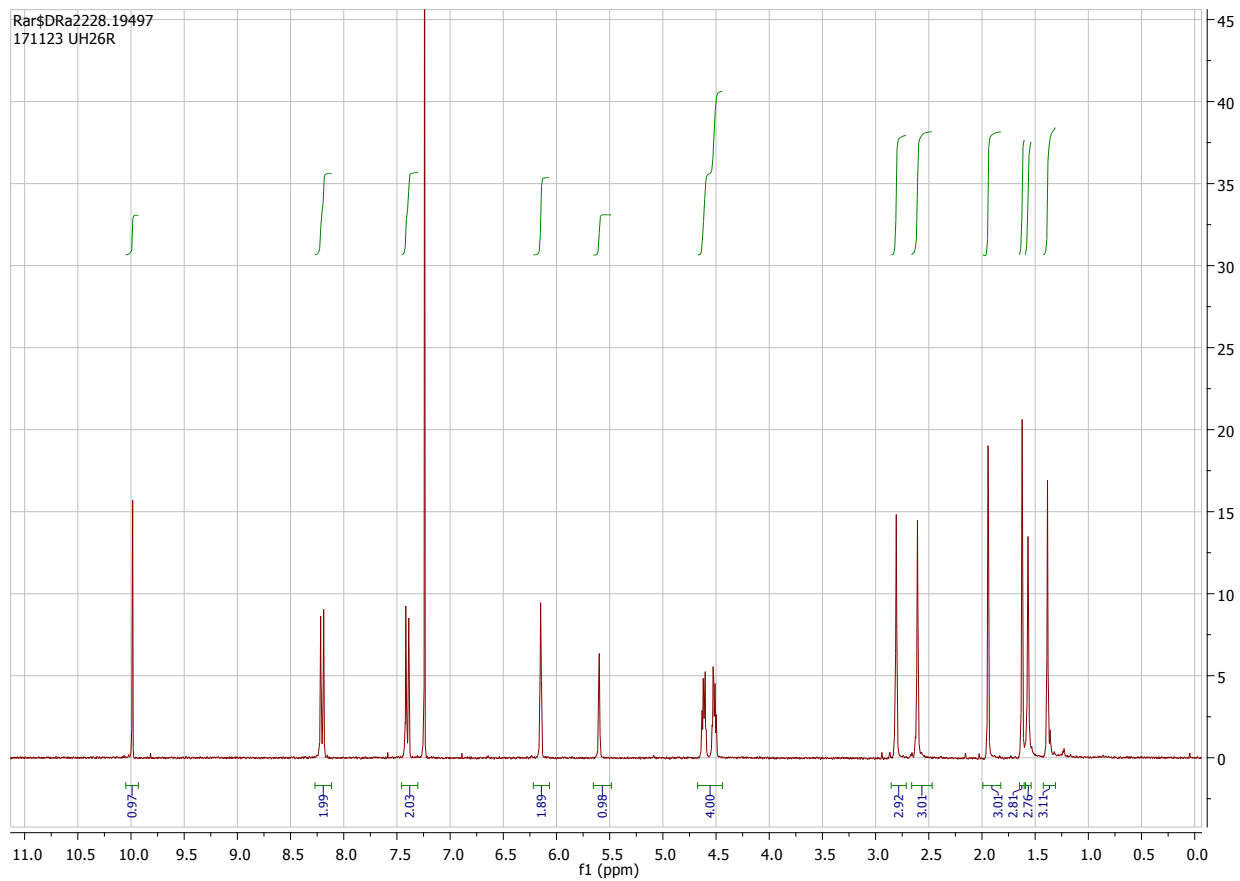

**Fig. S3**  $^1\text{H}$  NMR spectrum of **3**.

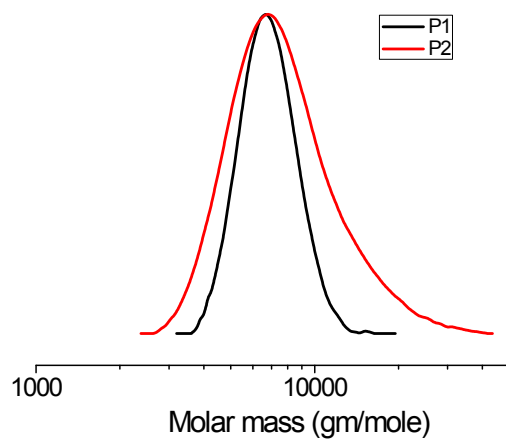

**Fig. S4** GPC-RI traces of P1 and P2.

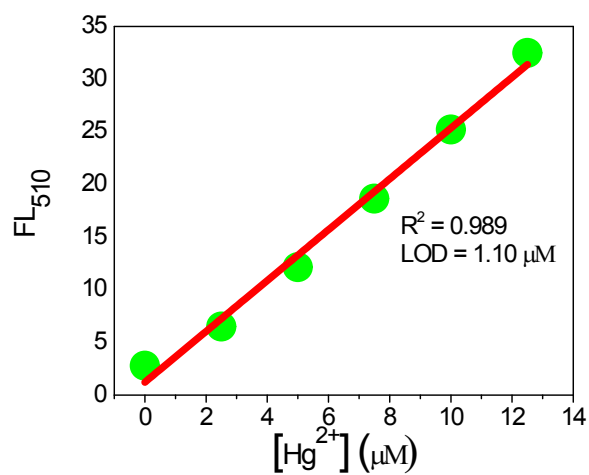

**Fig. S5** Determination of LOD for  $Hg^{2+}$  by fluorometric titration plot.

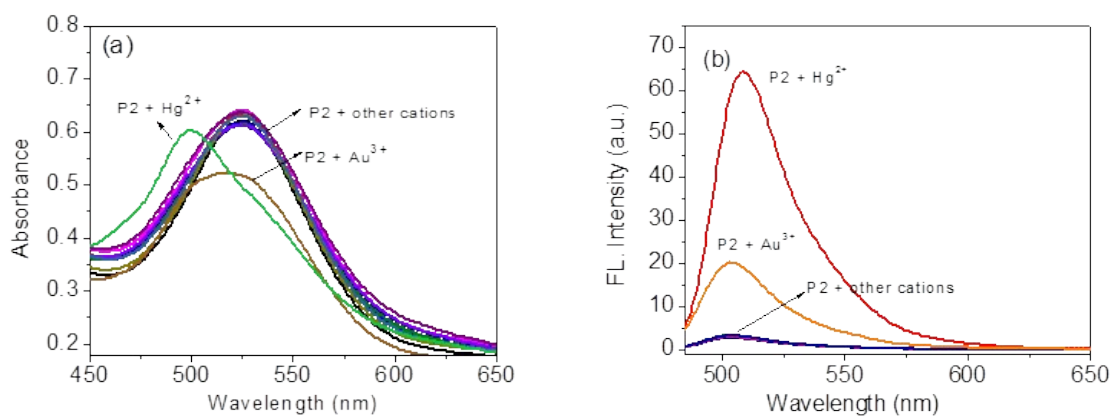

**Fig. S6** (a) UV-vis and (b) emission spectra of P2 in the presence of various cations in DI-water at ambient temperature.

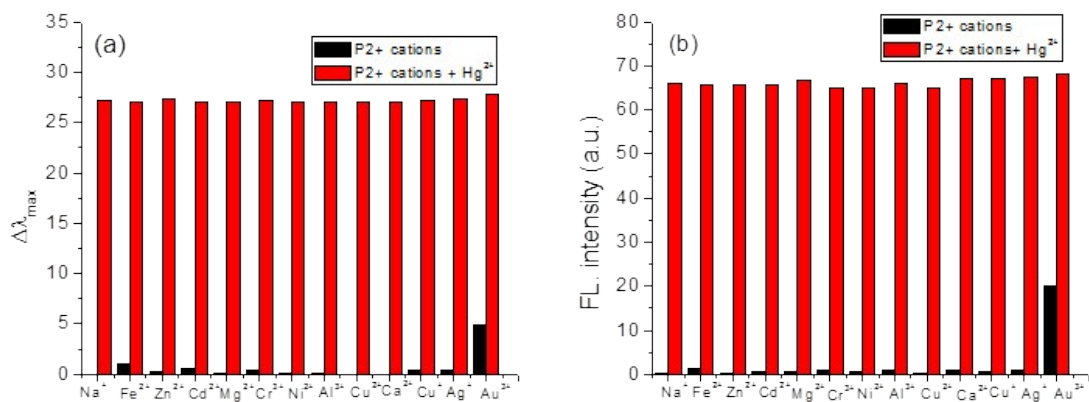

**Fig. S7** (a) UV absorption and (b) fluorescence intensity of P2 ( $2.0 \times 10^{-4}$  M) in the presence of  $\text{Hg}^{2+}$  ions along with other cations. In each case, 100 equivalent excess of competitive metal ions over P2 was added to the probe solution.

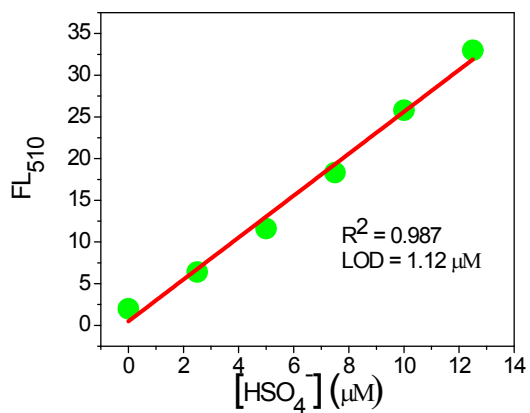

**Fig. S8** Determination of LOD for  $\text{HSO}_4^-$  by fluorometric titration plot.

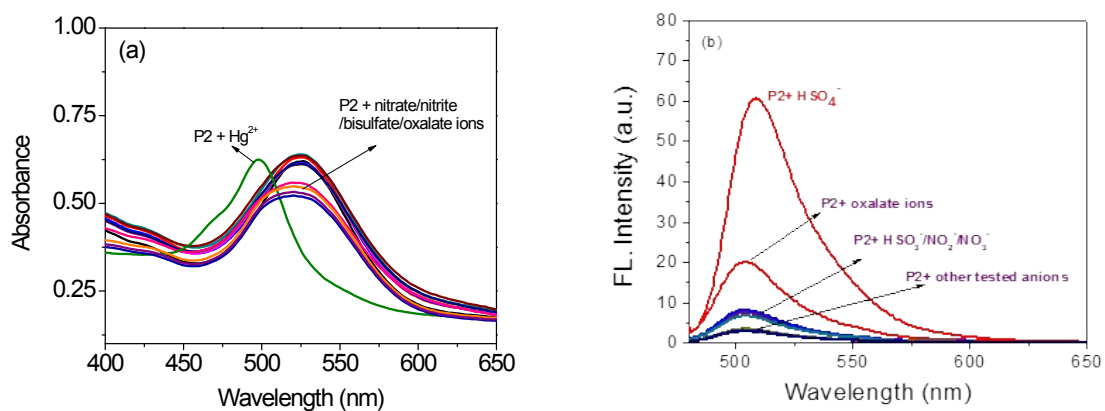

**Fig. S9** (a) UV-vis and (b) emission spectra of P2 in the presence of various anions in DI-water at ambient temperature.

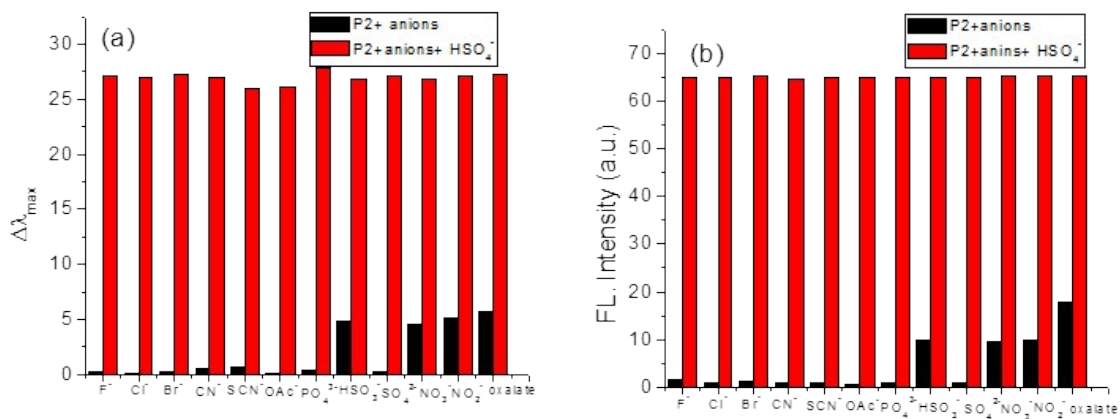

**Fig. S10** (a) UV absorption and (b) fluorescence intensity of P2 ( $2.0 \times 10^{-4}$  M) in the presence of  $\text{HSO}_4^-$  along with other anions. In each case, 100 equivalent excess of competitive anions was added to the probe solution.

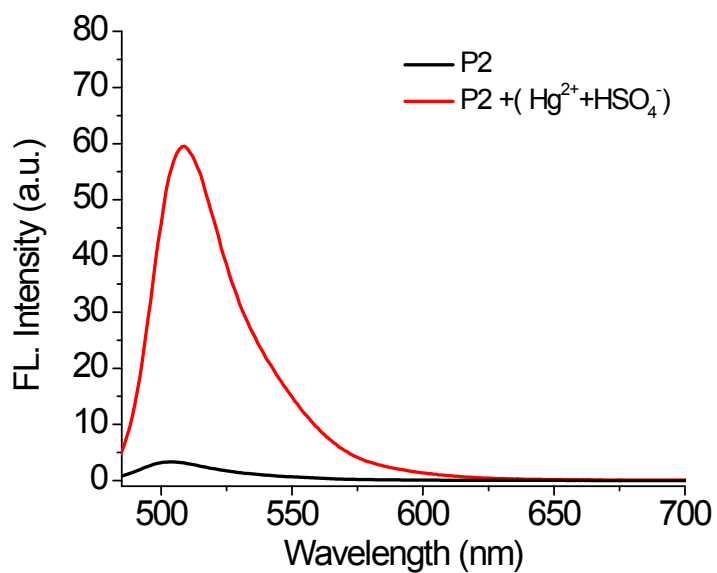

**Fig. S11** FL emission spectra of P2 ( $2.0 \times 10^{-4}$  M) before and after treatment of eqimolar concentration of  $\text{Hg}^{2+}$  and  $\text{HSO}_4^-$  ( $20 \mu\text{M}$  each analytes). Both the analytes were added in the same time.

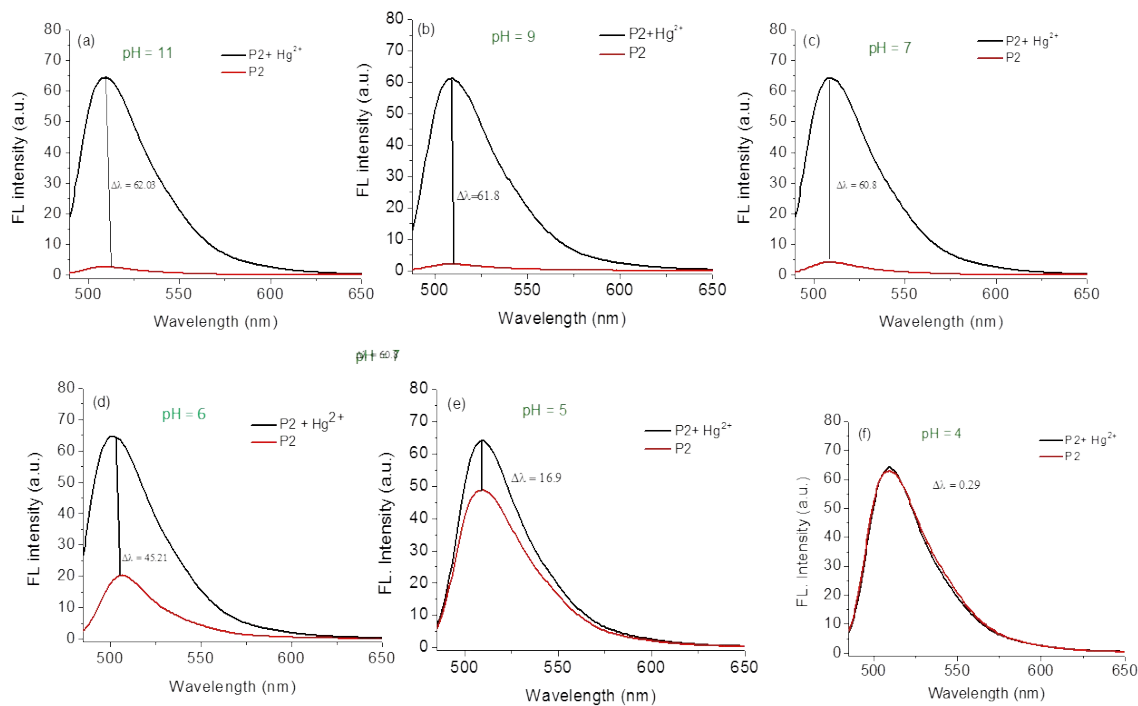

**Fig. S12** Changes in emission intensity of P2 at various pH with  $[\text{Hg}^{2+}]$  fixed at  $30 \mu\text{M}$ .

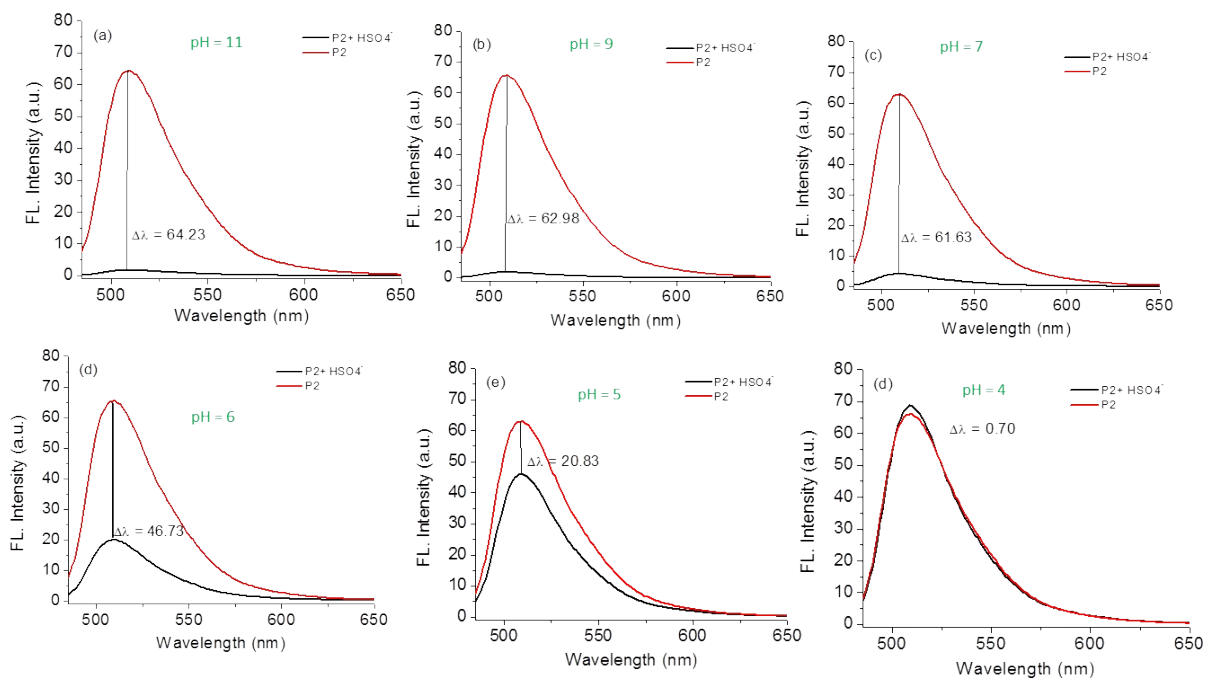

**Fig. S13** Changes in emission intensity of P2 at various pH with  $[\text{HSO}_4^-]$  fixed at  $30 \mu\text{M}$ .



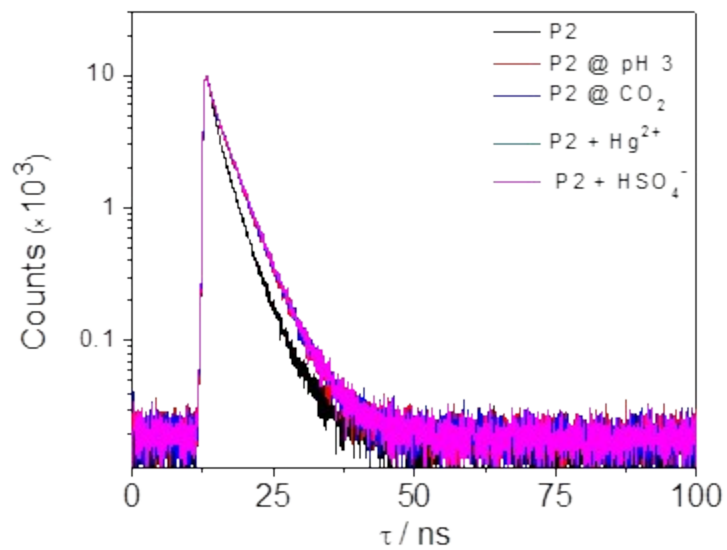

**Fig. S14** Fluorescence decay profile of P2 in the presence of chemical stimuli and analytes at 298K.

**Table S1.** Comparative table for various BODIPY-based chemsensors for the detection of Hg<sup>2+</sup> ion.

| Entry | Receptor | Metal ions                                       | Switching type | Working media                   | Detection limit                                                                                                        | Ref.    |
|-------|----------|--------------------------------------------------|----------------|---------------------------------|------------------------------------------------------------------------------------------------------------------------|---------|
| 1     | BODIPY   | Hg <sup>2+</sup>                                 | <i>Turn-on</i> | (1:1 v/v; acetonitrile/water)   | 5 × 10 <sup>-7</sup> M                                                                                                 | 1       |
| 2     | BODIPY   | Hg <sup>2+</sup>                                 | <i>Turn-on</i> | MeOH                            | 2.8 μM                                                                                                                 | 2       |
| 3     | BODIPY   | Hg <sup>2+</sup>                                 | <i>Turn-on</i> | 7:3 v/v; acetonitrile/PBS       | 0.77 μM                                                                                                                | 3       |
| 4     | BODIPY   | Hg <sup>2+</sup> , Au <sup>3+</sup>              | <i>Turn-on</i> | 4:1 v/v; EtOH/phosphate buffer) | 160 nM (Hg <sup>2+</sup> ); 120 nM (Au <sup>3+</sup> )                                                                 | 4       |
| 5     | BODIPY   | Hg <sup>2+</sup> , Cd <sup>2+</sup>              | <i>Turn-on</i> | 2:8 v/v DMSO-HEPES buffer)      | 1.88 × 10 <sup>5</sup> M <sup>-1</sup> (Hg <sup>2+</sup> ); 3.77 × 10 <sup>4</sup> M <sup>-1</sup> (Cd <sup>2+</sup> ) | 5       |
| 6     | BODIPY   | Hg <sup>2+</sup> , Cu <sup>2+</sup>              | <i>Turn-on</i> | acetonitrile                    | 0.53 M (Hg <sup>2+</sup> ); 0.08 M (Cu <sup>2+</sup> )                                                                 | 6       |
| 7     | BODIPY   | Hg <sup>2+</sup> , Ag <sup>+</sup>               | <i>Turn-on</i> | 85:15 v/v; THF-water            | 0.14 Mm (Hg <sup>2+</sup> ); 0.65 mM (Ag <sup>2+</sup> )                                                               | 7       |
| 8     | BODIPY   | HSO <sub>4</sub> <sup>-</sup>                    | <i>Turn-on</i> | 8:1 v/v; THF-water              | 6.45 × 10 <sup>-8</sup> M                                                                                              | 8       |
| 9     | BODIPY   | Hg <sup>2+</sup> , HSO <sub>4</sub> <sup>-</sup> | <i>Turn-on</i> | water                           | 1.10 μM (Hg <sup>2+</sup> ); 1.12 μM (HSO <sub>4</sub> <sup>-</sup> )                                                  | Present |

## References

1. A. Maity, A. Sil, S. Nad and S. K. Patra, *Sens. Actuators B Chem.*, 2018, **255**, 299-308.
2. M. Vedamalai and S. -Pao. Wu, *Eur. J. Org. Chem.*, 2012, **2012**, 1158–1163.
3. S. Madhu, D. K. Sharma, S. K. Basu, S. Jadhav, A. Chowdhury, and M. Ravikanth, *Inorg. Chem.*, 2013, **52**, 11136–11145.
4. C. Cantürk, M. Üçüncü and M. Emrulloğlu, *RSC Adv.*, 2015, **5**, 30522-30525.
5. S. B. Maity, S. Banerjee, K. Sunwoo, J. S. Kim and P. K. Bharadwaj, *Inorg. Chem.*, 2015, **54**, 3929–3936.
6. X. He, J. Zhang, X. Liu, L. Dong, D. Li, H. Qiu and S. Yin, *Sens. Actuators B Chem.*, 2014, **192**, 29– 35.
7. X. Zhang, Y. Xu, P. Guo and X. Qian, *New J. Chem.*, 2012, **36**, 1621–1625.
8. L. Wang, J. Ou, G. Fang, D. Cao, *Sens. Actuators B Chem.*, 2016, **222**, 1184-1192.
